# Supplementary material for: The nanoscale organization of the Wnt signaling integrator Dishevelled in the vegetal cortex domain of an egg and early embryo
Source: PubMed Central journal article supplement (PMC8153439; doi:10.1371/journal.pone.0248197), 2021-05-26
Supplement: pone.0248197.s001.pdf [file pone.0248197.s001.pdf]

S1 Table– for Henson et al., 2021 submitted to *PLoS One*

| LM Edge | LM Midway | LM Center | TEM  |
|---------|-----------|-----------|------|
| 0.56    | 1.52      | 2.92      | 1.57 |
| 1.12    | 1.4       | 2.68      | 1.86 |
| 0.4     | 1.2       | 2.48      | 2.39 |
| 1.08    | 1.2       | 2.84      | 2.26 |
| 0.56    | 2.36      | 2.76      | 2.79 |
| 1.12    | 1.36      | 2.64      | 1.4  |
| 0.36    | 1.48      | 2.84      | 2.12 |
| 0.44    | 1.96      | 3.16      | 1.96 |
| 0.84    | 1.52      | 2.8       | 1.34 |
| 0.16    | 2.28      | 3.68      | 1.74 |
| 0.28    | 3.04      | 3.6       | 1.88 |
| 0.24    | 2.12      | 3.2       | 2.38 |
| 0.6     | 2.08      | 3.56      | 1.85 |
| 0.32    | 1.72      | 3.8       | 1.66 |
| 0.44    | 2.16      | 3.8       | 2.15 |
| 0.96    | 2.68      | 2.88      | 1.10 |
| 0.36    | 3         | 3.68      | 0.79 |
| 0.24    | 3.52      | 3.88      | 1.42 |
| 0.36    | 2.88      | 4.32      | 1.61 |
| 1.04    | 3.48      | 4.6       | 0.81 |
| 1.12    | 2.08      | 4.12      | 1.08 |
| 0.92    | 2.4       | 3.96      | 2.21 |
| 0.96    | 2.84      | 5.32      | 2.40 |
| 0.36    | 2.84      | 5.24      | 2.30 |
| 0.6     | 2.32      | 3.72      | 1.50 |
| 0.64    | 2.6       | 4.68      |      |
| 1.12    | 1.4       | 4.6       |      |
| 0.6     | 1.64      | 4.88      |      |
| 0.68    | 2.04      | 4.96      |      |
| 0.88    | 1.56      | 5.28      |      |
| 0.96    | 1.56      | 2.4       |      |
| 0.8     | 2         | 2.72      |      |
| 0.68    | 1.8       | 2.44      |      |
| 0.6     | 1.92      | 3         |      |
| 0.72    | 1.44      | 2.52      |      |
| 0.68    | 1.52      | 2.72      |      |
| 0.64    | 1.24      | 3.04      |      |
| 0.48    | 1.48      | 2.24      |      |
| 0.32    | 1.28      | 2.44      |      |
| 0.6     | 1.28      | 3.16      |      |
| 0.88    | 1.2       | 3.32      |      |
| 0.68    | 1.92      | 2.72      |      |
| 0.68    | 1.88      | 3.16      |      |
| 0.68    | 1.48      | 2.96      |      |
| 0.44    | 1.64      | 3.24      |      |
| 0.72    | 1.4       | 3.32      |      |
| 0.4     | 1.16      | 3.04      |      |
| 0.32    | 1.16      | 3.32      |      |
| 0.24    | 1.04      | 4.04      |      |
| 0.56    | 1.24      | 3.6       |      |
| 0.56    | 1.6       | 4.64      |      |
| 0.52    | 1.64      | 4.08      |      |
| 0.96    | 2         | 4.68      |      |
| 1.28    | 1.56      | 4.48      |      |
| 1.08    | 1.76      | 4.6       |      |
| 0.4     | 1.8       | 4.36      |      |
| 0.44    | 1.44      | 3.92      |      |
| 0.52    | 1.48      | 4.12      |      |
| 1.16    | 1.36      | 4.64      |      |
| 0.92    | 1.28      | 4.28      |      |

PANEL A - for graphs in Figs 1J & 3G

| Ordinary one-way ANOVA                      |               |     |        |                    |          |
|---------------------------------------------|---------------|-----|--------|--------------------|----------|
| Table Analyzed                              | Data 1        |     |        |                    |          |
| Data sets analyzed                          | A-C           |     |        |                    |          |
| <b>ANOVA summary</b>                        |               |     |        |                    |          |
| F                                           | 345.4         |     |        |                    |          |
| P value                                     | <0.0001       |     |        |                    |          |
| P value summary                             | ****          |     |        |                    |          |
| Significant diff. among means (P < 0.05)?   | Yes           |     |        |                    |          |
| R squared                                   | 0.7961        |     |        |                    |          |
| <b>Brown-Forsythe test</b>                  |               |     |        |                    |          |
| F (DFn, DFd)                                | 26.52 (2, 17) |     |        |                    |          |
| P value                                     | <0.0001       |     |        |                    |          |
| P value summary                             | ****          |     |        |                    |          |
| Are SDs significantly different (P < 0.05)? | Yes           |     |        |                    |          |
| <b>Bartlett's test</b>                      |               |     |        |                    |          |
| Bartlett's statistic (corrected)            | 58.41         |     |        |                    |          |
| P value                                     | <0.0001       |     |        |                    |          |
| P value summary                             | ****          |     |        |                    |          |
| Are SDs significantly different (P < 0.05)? | Yes           |     |        |                    |          |
| <b>ANOVA table</b>                          |               |     |        |                    |          |
|                                             | SS            | DF  | MS     | F (DFn, DFd)       | P value  |
| Treatment (between columns)                 | 263.9         | 2   | 131.9  | F (2, 177) = 345.4 | P<0.0001 |
| Residual (within columns)                   | 67.60         | 177 | 0.3819 |                    |          |
| Total                                       | 331.5         | 179 |        |                    |          |
| <b>Data summary</b>                         |               |     |        |                    |          |
| Number of treatments (columns)              | 3             |     |        |                    |          |
| Number of values (total)                    | 180           |     |        |                    |          |

PANEL B - for graph in Fig 1J

| <i>L. pictus</i> | <i>S. purpuratus</i> |
|------------------|----------------------|
| 15617            | 8609                 |
| 13070            | 28784                |
| 11264            | 9447                 |
| 10387            | 15980                |
| 15143            | 22949                |
| 12608            | 12902                |
| 9456             | 12567                |
| 14243            | 18579                |
| 14320            | 16437                |
| 22267            | 11634                |
| 14900            | 15195                |
| 17049            | 13335                |
| 24450            | 11348                |
| 19762            | 13833                |
| 16001            | 13955                |
| 12546            | 10684                |
| 19383            | 8350                 |
| 20957            | 24894                |
| 32312            | 24528                |
| 20103            | 34168                |

PANEL C – for graph in Fig 3H

| Unpaired t test                     |                      |
|-------------------------------------|----------------------|
| Table Analyzed                      | Data 1               |
| Column B                            | <i>S. purpuratus</i> |
| vs.                                 | vs.                  |
| Column A                            | <i>L. pictus</i>     |
| <b>Unpaired t test</b>              |                      |
| P value                             | 0.8496               |
| P value summary                     | ns                   |
| Significantly different (P < 0.05)? | No                   |
| One- or two-tailed P value?         | Two-tailed           |
| t, df                               | t=0.1909, df=38      |
| <b>How big is the difference?</b>   |                      |
| Mean of column A                    | 16792                |
| Mean of column B                    | 16409                |
| Difference between means (B - A)    | -383.0 ± 2006        |
| 95% confidence interval             | -4444 to 3678        |
| R squared (eta squared)             | 0.0009583            |
| <b>F test to compare variances</b>  |                      |
| F, DFn, Dfd                         | 1.687, 19, 19        |
| P value                             | 0.2632               |
| P value summary                     | ns                   |
| Significantly different (P < 0.05)? | No                   |
| <b>Data analyzed</b>                |                      |
| Sample size, column A               | 20                   |
| Sample size, column B               | 20                   |

PANEL D - for graph in Fig 3H

| UF-VCD Center | CL-VCD Center |
|---------------|---------------|
| 3.8           | 3             |
| 4.5           | 2.7           |
| 3.7           | 2.4           |
| 4.4           | 2.3           |
| 3.5           | 2             |
| 3.6           | 2.1           |
| 3             | 1.8           |
| 3             | 2.1           |
| 2.8           | 2             |
| 3.2           | 2.1           |
| 2.8           | 2.6           |
| 2.4           | 2.4           |
| 2.8           | 2.1           |
| 2.7           | 1.5           |
| 3             | 1.6           |
| 2.6           | 1.5           |
| 3.9           | 1.8           |
| 4.1           | 1.6           |
| 3.6           | 1.4           |
| 4.7           | 1.8           |

PANEL E - for graph in Fig 7F

| Unpaired t test                        |                  |
|----------------------------------------|------------------|
| Table Analyzed                         | Data 1           |
| Column B                               | CL-VCD Center    |
| vs.                                    | vs.              |
| Column A                               | UF-VCD Center    |
| <b>Unpaired t test</b>                 |                  |
| P value                                | <0.0001          |
| P value summary                        | ****             |
| Significantly different (P < 0.05)?    | Yes              |
| One- or two-tailed P value?            | Two-tailed       |
| t, df                                  | t=7.594, df=38   |
| <b>How big is the difference?</b>      |                  |
| Mean of column A                       | 3.405            |
| Mean of column B                       | 2.040            |
| Difference between means (B - A) ± SEM | -1.365 ± 0.1797  |
| 95% confidence interval                | -1.729 to -1.001 |
| R squared (eta squared)                | 0.6028           |
| <b>F test to compare variances</b>     |                  |
| F, DFn, Dfd                            | 2.441, 19, 19    |
| P value                                | 0.0588           |
| P value summary                        | ns               |
| Significantly different (P < 0.05)?    | No               |
| <b>Data analyzed</b>                   |                  |
| Sample size, column A                  | 20               |
| Sample size, column B                  | 20               |

PANEL F - for graph in Fig 7F
